# Supplementary material
Source: PubMed Central journal article supplement (PMC4079119)
Supplement: NIHMS588027-supplement-Supp_Material.pdf [file NIHMS588027-supplement-Supp_Material.pdf]

# Supporting information for

**A role for FtsA in SPOR-independent localization of the essential**

***Escherichia coli* cell division protein FtsN**

Kimberly K. Busiek and William Margolin\*

Department of Microbiology & Molecular Genetics, University of Texas Medical School at Houston,

Houston, Texas, USA

## SUPPLEMENTARY EXPERIMENTAL PROCEDURES

**Immunofluorescence microscopy.** Cells of *ftsA12*(Ts) strain WM1115 expressing *gfp* (pWM1088) were fixed using paraformaldehyde/glutaraldehyde fixative and stained as described previously (Levin, 2002). Rabbit anti-His<sub>6</sub>-FtsA antibody (Capralogics, Inc.; Hardwick, MA) was affinity purified (Levin, 2002) and applied at a final concentration of 1:500. Goat anti-rabbit Alexa Fluor 488-conjugated antibody (Molecular Probes; Eugene, OR) was applied at a final concentration of 1:200.

**Temperature-shift experiments with *ftsQ* TOE1 and *ftsI* AX655 temperature sensitive strains.** Cultures of *ftsQ*(Ts) strain WM2193 and *ftsI*(Ts) strain WM2348 expressing *gfp* (pWM1088), *gfp-ftsN<sub>Cyto-TM</sub>* (pWM4528), *gfp-ftsN* (pWM1152), or *gfp-ftsZ* (pWM3775), or <sup>TT</sup>*mCherry-ftsN<sub>SPOR</sub>* (pWM4740) were grown at 30°C without inducer to an OD<sub>600</sub> of 0.3-0.4 prior to heat shock. Thymine was added to WM2193, which is *thyA*. Cultures were shifted to 42°C for 30 minutes. DIC and fluorescence images were obtained immediately before and after shifting cultures to the non-permissive temperature.

**Spot dilution assays.** Spot dilution assays of *ftsN* depletion strain WM4028 harboring pWM2784 (pDSW210-*flag*), pWM4612 (pDSW210-*flag-virB10<sub>Cyto</sub>N<sub>TM-Peri</sub>ΔSPOR*), pWM4582 (pDSW210-*flag-virB10<sub>Cyto</sub>N<sub>TM-Peri</sub>*), pWM4613 (pDSW210-*flag-ftsN<sub>ΔSPOR</sub>*), or pWM3157 (pDSW210-*flag-ftsN*) were performed using cultures grown without IPTG to low OD<sub>600</sub> at 30°C. Cultures were spot diluted (10<sup>-3</sup>-10<sup>-6</sup>) onto LB plates containing 0, 10, or 100 μM IPTG. Plates were incubated at 30°C and 42°C.

SUPPLEMENTARY FIGURES

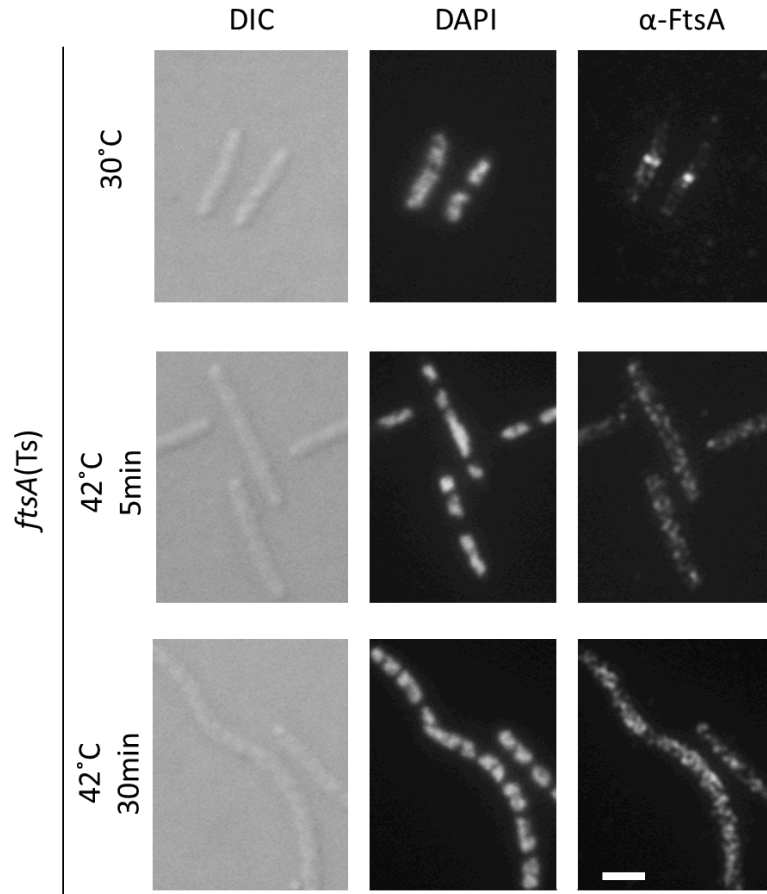

**FIG. S1. FtsA12(Ts) delocalizes from division sites within 5 minutes at 42°C.** DIC (left), DAPI (middle), and anti-FtsA (right) images of *ftsA12(Ts)* (WM1115) strain harboring plasmid pWM1088 (pDSW207-*gfp*). Cells were grown to low OD<sub>600</sub> without IPTG at 30°C then shifted to 42°C for 5 and 30 minutes. Cells

were fixed before staining DNA with DAPI and detecting FtsA with anti-FtsA primary and Alexa Fluor 488-conjugated secondary antibodies. Scale bar = 4  $\mu$ m.

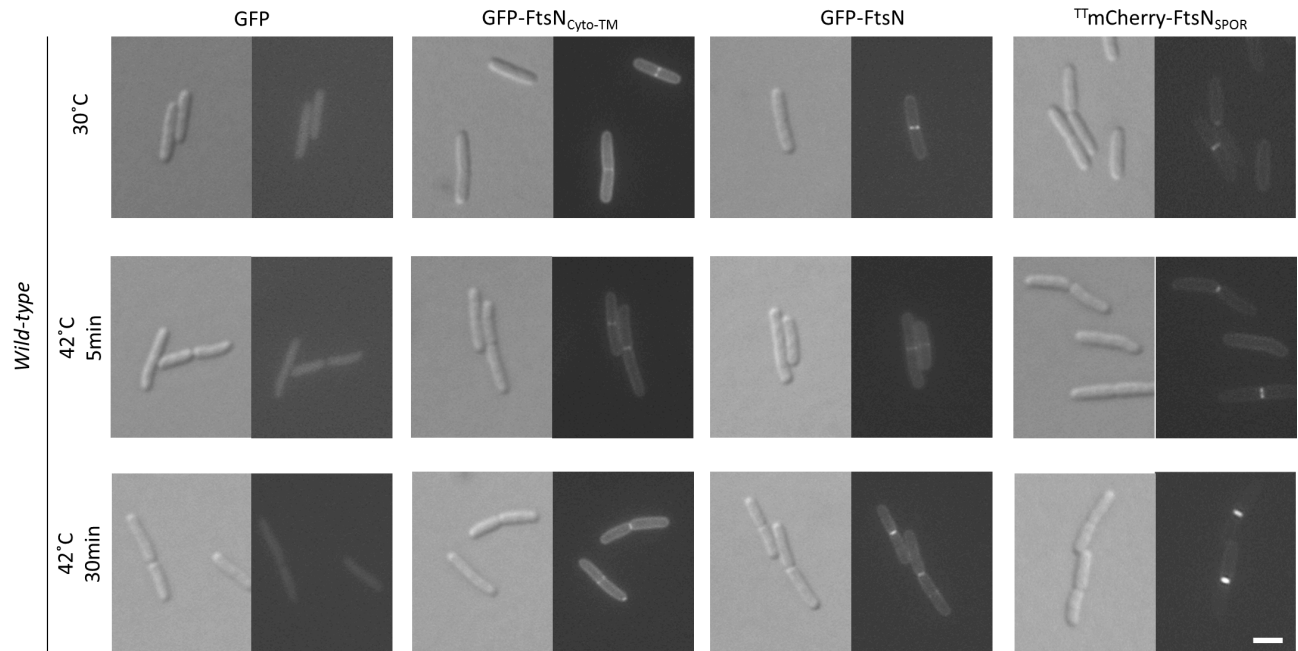

**FIG. S2. Localization of GFP- and <sup>TT</sup>mCherry-tagged constructs is not disrupted at 42°C in wild-type cells.** DIC (left) and fluorescence (right) images of wild-type (WM1074) strains harboring plasmids pWM1088 (pDSW207-*gfp*), pWM4528 (pDSW207-*gfp-ftsN<sub>Cyto-TM</sub>*), pWM1152 (pDSW207-*gfp-ftsN*), or pWM4740 (pKG116-<sup>TT</sup>*mCherry-ftsN<sub>SPOR</sub>*). Cells were grown to low OD<sub>600</sub> without IPTG (pDSW207 strains) or with 1  $\mu$ M sodium salicylate (pKG116 strain) at 30°C then shifted to 42°C for 5 and 30 minutes. Scale bar = 4  $\mu$ m.

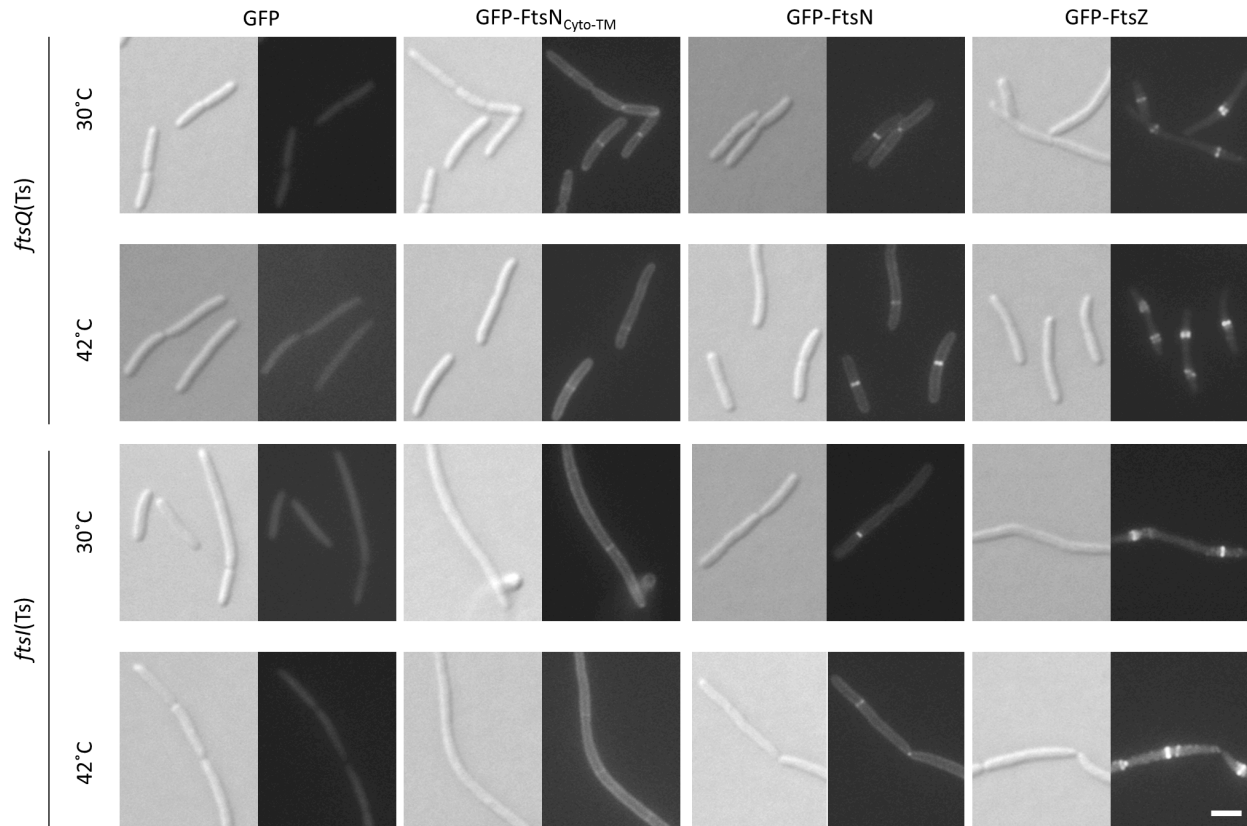

**FIG. S3. Localization of GFP-FtsN<sub>Cyto-TM</sub> in *ftsQ*(Ts) and *ftsI*(Ts) strains.** DIC (left) and fluorescence (right) images of *ftsQ*(Ts) and *ftsI*(Ts) strains harboring plasmids pWM1088 (pDSW207-*gfp*), pWM4528 (pDSW207-*gfp-ftsN<sub>Cyto-TM</sub>*), pWM1152 (pDSW207-*gfp-ftsN*), or pWM3775 (pDSW207-*gfp-ftsZ*). Cells were grown to low OD<sub>600</sub> without IPTG at 30°C then shifted to 42°C for 30 minutes. Scale bar = 4 μm.

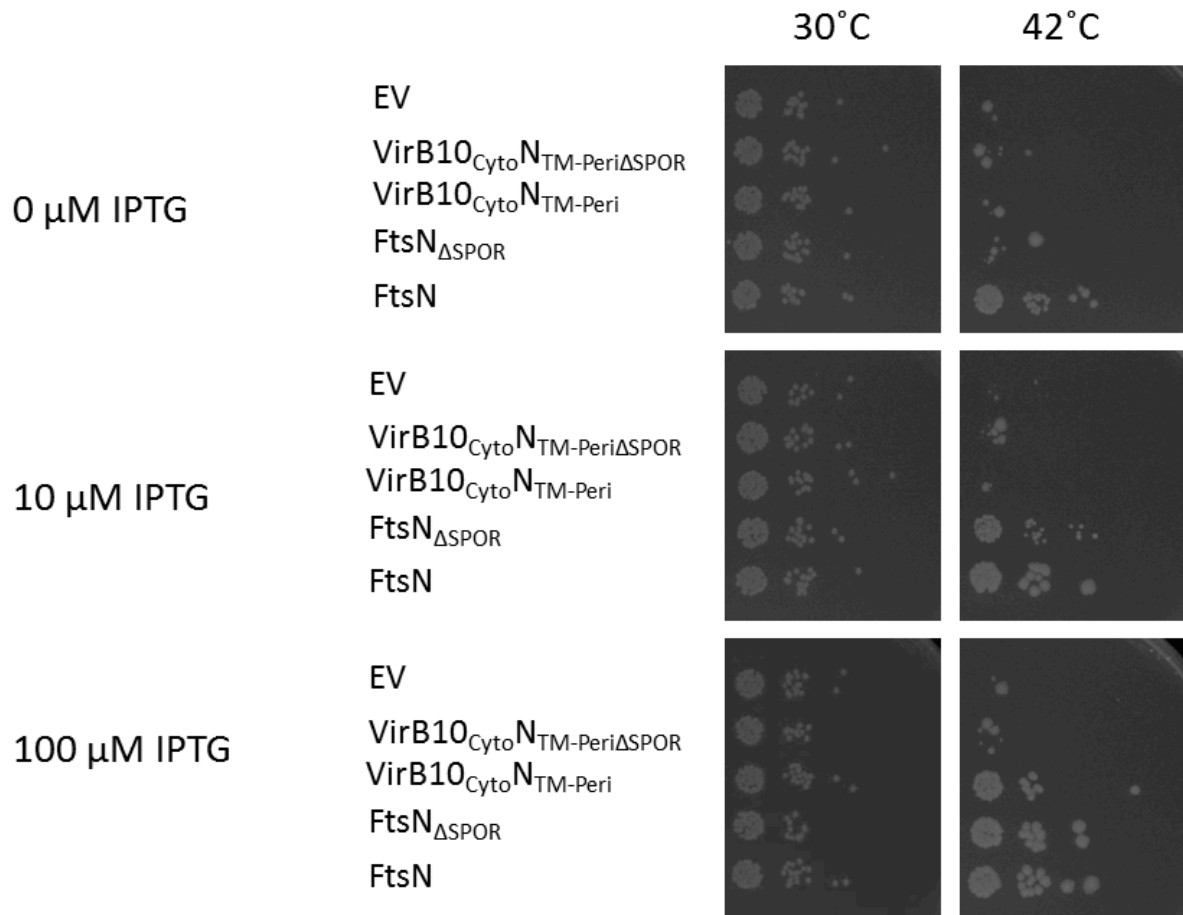

**FIG. S4. Substitution and/or deletion of the cytoplasmic and SPOR domains of FtsN reduce viability in an *ftsN* depletion strain.** Spot dilution assays of *ftsN* depletion strain WM4028 harboring pWM2784 (pDSW210-*flag*), pWM4612 (pDSW210-*flag-virB10*<sub>Cyto</sub>N<sub>TM-Peri</sub>ΔSPOR), pWM4582 (pDSW210-*flag-virB10*<sub>Cyto</sub>N<sub>TM-Peri</sub>), pWM4613 (pDSW210-*flag-ftsN*<sub>ΔSPOR</sub>), or pWM3157 (pDSW210-*flag-ftsN*). Cultures were grown without IPTG to low OD<sub>600</sub> at 30°C. Cultures were diluted to 10<sup>-3</sup>-10<sup>-6</sup> concentrations and spotted onto LB plates containing 0, 10, or 100 μM IPTG and incubated at 30°C and 42°C.

TABLE S1. Oligonucleotide primers used in this study.

| Primer # | Sequence (5' – 3')                       |
|----------|------------------------------------------|
| 111      | ACGAAGCTTTCAACCCCGGCGGCGAG               |
| 112      | CGAGAATTCAACAACAACGCACAACGAGATTATG       |
| 1115     | GCTCTAGAGCACAACGAGATTATGTACGCCGC         |
| 1116     | GCCTGCAGTCAACCCCGGCGGCGAGCCGAATGC        |
| 1803     | GTCTTTTCGGGGTCTCAGAACTGCCTGCGGTTTCTCCCGC |
| 1804     | GCGGGAGAAACCGCAGGCAGTTTCTGAGACCCCGAAAGAC |
| 1809     | GGTCTAGAAATAACGATAGTCAGCAAG              |
| 2003     | ACGAAGCTTTCACGTAATGAAGTACAG              |
| 2047     | ACGAAGCTTTCAACCTAGCCAAATGAGG             |
| 2048     | CGAGAATTCAACAACAACAATAACGATAGTCAGC       |
| 2049     | GCCTGCAGTCATTCTCCGCCGTCGGTTTTGGCGC       |
| 2051     | AATCTAGAATGATCAAGGCGACGGACAG             |
| 2052     | TTCTGCAGCTCTCCGATTTGTGCCTGTC             |
| 2054     | CGACTGCGGCGCAAGCGGCGATGGTGAGCAAGGGCGAGG  |
| 2055     | CCTCGCCCTTGCTCACCATCGCCGCTTGCGCCGAGTCG   |
| 2056     | GCGGAATTCATGGCGAACAATAACGATC             |
| 2057     | CGCGGATCCCTTGTACAGCTCGTCCATGC            |
| 2058     | GCGGGATCCGAGAAAAAAGACGAACGC              |
| 2059     | CGCTCTAGATCAACCCCGGCGGCGAGC              |
| 2060     | ACGAAGCTTTCATTCTCCGCCGTCGGTTTTGGCGC      |
| 2063     | GCGATGCATATGGCGAACAATAACGATC             |

TABLE S2. Supplemental strains.

| Strain or plasmid | Genotype or description                                 | Source or reference |
|-------------------|---------------------------------------------------------|---------------------|
| WM2193            | <i>ftsQ1</i> (Ts) strain TOE1, K12 parent strain AB2497 | Begg et al. (1980)  |
| WM2348            | <i>ftsI</i> (Ts) strain AX655, K12 parent strain AB1157 | Allen et al. (1974) |



## REFERENCES

- Allen, J. S., C. C. Filip, R. A. Gustafson, R. G. Allen & J. R. Walker (1974) Regulation of bacterial cell division: genetic and phenotypic analysis of temperature-sensitive, multinucleate, filament-forming mutants of *Escherichia coli*. *J Bacteriol* 117: 978-986.
- Begg, K. J., G. F. Hatfull & W. D. Donachie (1980) Identification of new genes in a cell envelope-cell division gene cluster of *Escherichia coli*: cell division gene *ftsQ*. *J Bacteriol* 144: 435-437.
- Levin, P. A. (2002) Light microscopy techniques for bacterial cell biology. In: *Methods in Microbiology* Sansonetti, P. and Zychlinsky, A. (eds). London: Academic Press Ltd., pp. 112-132.
